# Supplementary figures and images for: X-Ray structure and ionic conductivity studies of anhydrous and hydrated choline chloride and oxalic acid deep eutectic solvents
Source: Royal Society of Chemistry journal article supplement (doi:10.1039/c8cp06728g), 2018-01-01

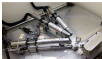

Supplement: c8cp06728g1.pdf [file c8cp06728g1.pdf]

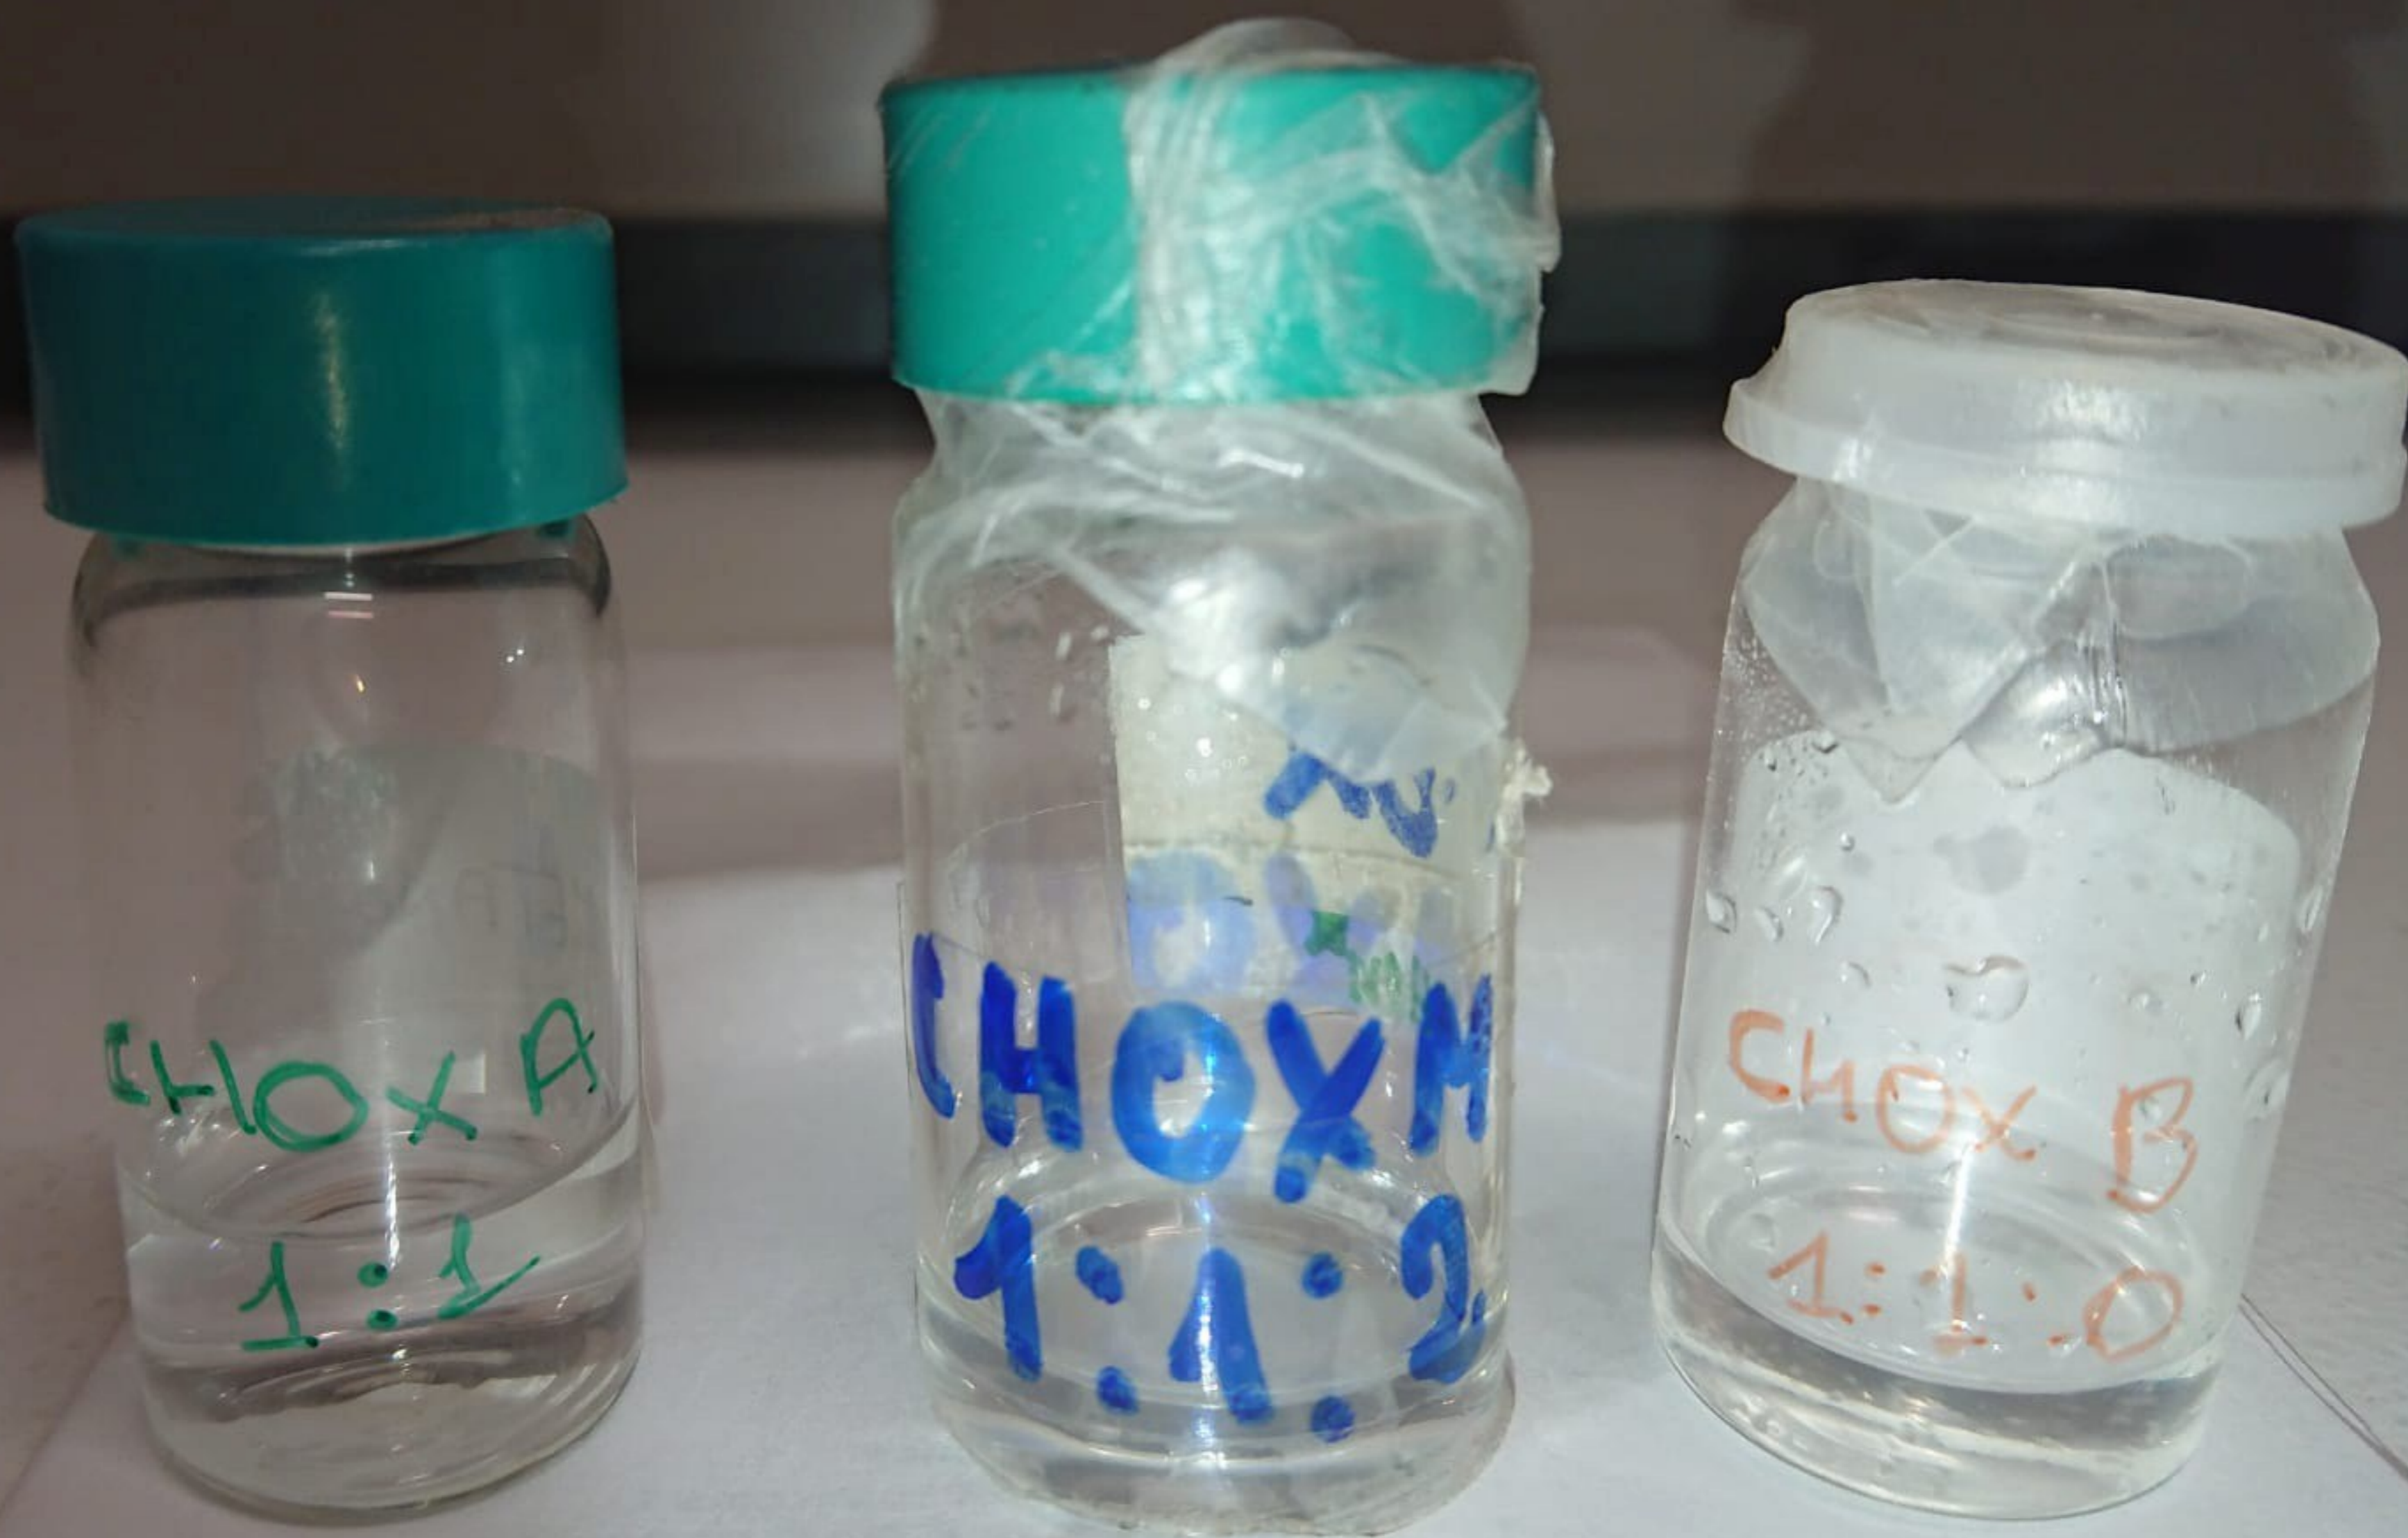

Supplement: c8cp06728g2.pdf [file c8cp06728g2.pdf]
